# Supplementary material for: Improved representation of river runoff in Estimating the Circulation and Climate of the Ocean Version 4 (ECCOv4) simulations: implementation, evaluation and impacts to coastal plume regions
Source: Copernicus journal article supplement (doi:10.5194/gmd-2020-321), 2020-10-27
Supplement: Supplementary file [file gmd-2020-321-AC2-supplement.pdf]

## Response-to-reviewer 2:

*We thank reviewer 2's thoughtful suggestions, which help us to improve our work. The question regarding the difference between C and R runs is excellent. We have since designed two additional experiments, LLC270R\_spread and LLC270R\_clim, to address this question. In addition, we have responded other comments one-by-one as follows. The line numbers below are referred to the revised manuscript.*

My first criticism deals with the comparisons with observations. On one hand, the synchronized validation against SMAP SSS is done only over a period of 33 months. On the other hand, there is this discrepancy between using the WOA18 (including data from 1955-2010) and a climatology from the simulation based on only years 2015- 2017. Could you please comment on the significance of such comparisons? Maybe emphasize the caveats in the text...

**Response:** *We thank the reviewer for bringing up this problem. We, the co-authors, had a lot of discussions on this part as we developed this work. The improvement to ECCOv4 mainly focused on the plume representations, for which there isn't enough in-situ observational data available publicly. SMAP is satellite observation. Although satellite products have nice spatio-temporal coverage as the ECCOv4 SSS products, previous studies of Mississippi river plume and Bay of Bangle found that all satellite SSS observation had some bias comparing to in-situ World Ocean Database (See Fournier et al. 2016; 2017). Fournier et al. (2016; 2017) adjusted the satellite SSS values to compensate for the bias in their studies. In contrast, WOA18 is an objective analysis of in-situ observations from a period of "climate normal" years (1981-2010) (Zweng et al., 2019). We compared ECCOv4 output with the WOA data for the absolute values of SSS (Table 2), which complements the comparisons with the SMAP data for the spatio-temporal patterns of plumes (Figures 2 &3). In addition, the comparisons in Table 2 and 3 demonstrate not only which ECCO experiment is closer to the climatological "truth", but also how ECCO products compared to SMAP. For example, in the Amazon River plume region, SMAP SSS underestimated WOA SSS by about 5.2 PSU. We hope this kind of information can be helpful for researchers to make informative decisions when using ECCO or SMAP products to pursue their scientific questions. We've already discussed the limitation of WOA and SMAP in Lines 246 – Line 256 in the revised manuscript. To highlight the point above, we have added the following statement "We firstly found that the SMAP SSS is lower than the WOA18 SSS for large rivers. The underestimation is more than 5 PSU for the Amazon region." Please refer Line 272-Line 274 for the main text. We also added some discussions from Line 198 to Line 306 in the revised manuscript.*

### **References:**

*Fournier, S., Lee, T. and Gierach, M. M., Seasonal and interannual variations of sea surface salinity associated with the Mississippi River plume observed by SMOS and Aquarius, Remote Sensing of Environment, 180, 431 – 439. doi:10.1016/j.rse.2016.02.050, 2016*

*Fournier, S., Vandemark, D., Gaultier, L., Lee, T., Jonsson, B., and Gierach, M. M. Interannual*

*variation in offshore advection of Amazon-Orinoco plume waters: Observations, forcing mechanisms, and impacts. Journal of Geophysical Research: Oceans, 122, 8966–8982. doi:10.1002/2017JC013103, 2017*

*Zweng, M.M, Reagan, J.R., Seidov, D., Boyer, T.P., Locarnini, R.A., Garcia, H.E., Mishonov, A.V., Baranova, O.K., Weathers, K.W., Paver, C.R. and Smolyar, I.V. World Ocean Atlas 2018, Volume 2: Salinity. A. Mishonov, Technical Editor, NOAA Atlas NESDIS 82, 50pp., 2019*

My second major concern: If I understood correctly, the difference between C and R runs is not only the forcing method (single point source versus area adjacent to river mouth) but also the temporal resolution of the prescribed runoff (monthly in C vs daily in R) and actually the dataset that serves as basis. That complicates the comparisons in my opinion and one is not sure if the improvements between C and R at a given resolution are entirely attributable to the forcing methodology (the benefit of which, I believe, is the point the authors are trying to make) or, on the other hand, additionally due to temporal resolution in the forcing. Please elaborate on this problem.

**Response:** *This is a great question. We appreciated the reviewer's insightful thoughts on the design of our experiment design. It is true that the difference between C and R could be attributed firstly to the diffusive versus point-source runoff; and secondly to the river discharge file itself. To further explore the problem, we did another two experiments based on the LLC270 grid, which showed the best performance when taking SMAP as the observational reference. Exp. LLC270R\_spread, which used the diffusive surface forcing method, but daily JRA55DO runoff. Exp. LLC270R\_clim, which used point-source surface forcing, but climatological runoff derived from 2015-2017 JRA55DO (Table 1). We updated Tables 1-3, Figures 3 and 4, and placed a new figure in the supplementary material (S8) for further experiments. We updated the corresponding statement from Line 163 to Line 171; Line 278 to Line 291; Line 307 to Line 316; Line 341 to Line 352; Line 360 to Line 371. We now refer to adding runoff to multiple cells from the surface as the diffusive runoff; to a single grid cell as the point-source runoff.*

*From the updated Table 2, with the diffusive surface forcing, LLC270R\_spread driven by daily JRA55DO had lower salinity than LLC270C driven by Fekete. This is not a surprise, since the model automatically interpolates the river forcing file to the model grids. The Fekete river discharge file spreads spatially more than JRA55DO before the model interpolation (Figure S1). This means less freshwater is added to the top of the interested river mouth region, resulting in a relatively high salinity. Moreover, with the JRA55DO forcing, the sea surface salinity with the point-source forcing (LLC270R) was lower than the diffusive forcing (LLC270R\_spread). We can think about adding river to single grid cell instead of multiple cells was equivalent to decreasing the inlet width in regional models, which results in an increase in the inflow velocity, thus more efficiently spreading riverine freshwater within our selected river mouth area (Table 2). Lastly, our new runs show that with point-source river forcing, the runoff using year-by-year JRA55DO and climatological JRA55DO produced inconsistent SSS changes for selected rivers. Specifically, in the experiments with climatological JRA55DO, CG, CJ and PA river plumes have higher SSS, while AZ, GB, MR, MK and CO river plumes have lower SSS.*

*When taking SMAP as the reference, the model skill shows that LLC270R\_spread is better than LLC270C for most rivers, such as AZ, GB, MR, PA, and CO. This is not surprising since JRA55DO runoff includes both seasonal and interannual variability, while Fekete only changes seasonally. As a comparison, the skill of LLC270R\_spread is worse than LLC270R. This is because diffusive forcing had higher SSS than point-source forcing (Figure S8). When taking WOA as the reference, the model skill shows climatological forcing run (LLC270R\_clim and LLC270C) had better skill than daily forcing runs (LLC270R\_spread and LLC270R). This is not surprising since WOA is a climatological dataset.*

*The difference between time-averaged LLC270 runs and SMAP are presented in Figure S8. The SSS bias was reduced near the Amazon by switching diffusive surface forcing from Fekete to JRA55DO. The positive bias became negative after switching diffusive to the point source. This also happened to the Mississippi and Columbia River. The SSS bias change is consistent with the above discussion for Table 2 and Table 3. The SSS time series near the river mouth are shown in updated figure 3. The 2017 spring Amazon flood can be seen when forced by diffusive daily JRA55DO (LLC270R\_spread), but not by diffusive climatological Fekete case (LLC270C). The Mississippi/Columbia River mouth region is different from the Amazon in that the annual cycle of LLC270R\_spread is stronger than in LLC270C in all three years. This is because the seasonality of the Mississippi-Atchafalaya/Columbia River mouth has been oversmoothed in the climatological Fekete. The LLC270R\_clim fluctuates in comparable with the LLC270R, except the annual extreme low SSS were comparable for the three simulated year.*

*Lastly, we updated the original figure 4 (target diagram) by comparing LLC270C and LLC270R to LLC270R\_spread and LLC270R. The reason is that the target diagram takes SMAP as the observational reference. SMAP SSS include both seasonal and interannual variability, hence it is more meaningful to compare the two cases driven by river discharge with both seasonal and interannual signals. With the same daily JRA55DO, we found the normalized bias is lower in the experiment with point sources than in the experiment with diffusive sources in general when forced with daily JRA55DO. The change in normalized unbiased RMSD are largely negligible compared to the changes in normalized bias for most rivers, except CG and MK. Most unbiased RMSD remains negative when switching the runoff forcing from climatological to daily for most regions. This implies that the variance of LLC simulations remains lower than SMAP observations despite of the runoff forcing changes. The exception of the Congo River was possibility because it is a near equator eastern boundary plume where freshwater transport distinguish from others, while the exception of MK was because SMAP are contaminated by the land signal near Vietnam coast that the SSS timeriers had a big noise.*

*Since we are interested in how the new DPR implementation is different from the widely used general ECCOv4 (forced by Fekete runoff), we did not change the discussion part for impacts on river plume properties, MLD, and strength of stratification.*

My last main question is: Why is there no simulation including the climatological forcing at the LLC540 resolution? Would make the comparisons more robust? The authors should also

try to explain why the finest resolution seems to present a poorer comparison to observations.

**Response:** *Again, this is a great question. We have tested the climatological diffusive river forcing and daily point source river forcing on ECCO CS510 grid first, which has a spatial resolution about 19 km. After switching to the LLC grid, the LLC540 setup had comparable resolution with CS510 grid set up. We had found that grid type switch with closer resolution had minor impacts on our studied rivers. Therefore, we anticipate that LLC540C vs LLC540R would be close to CS510C vs. CS510R.*

*We agree with the reviewer's last comment "increasing resolution always increasing the richness of spatio-temporal scales", which is true. In our study, high resolution runs brought results further from SMAP, but they might not be further from the real world. Note that SMAP itself is a satellite product with 1/4° resolution, while LLC540R SSS at 1/6° resolution contains more dynamic features.*

*We are sorry that part of our discussions and a comparison with SMAP may confuse the reviewer about the resolution impact. We've emphasized that we use SMAP and WOA18 as "observational references", where our model-observation comparisons provide useful information on how SSS change between experiments rather than determine which experiment is closer to the real world" (Please see Line 253-Line 256 in the main text). For further clarification, we changed the title of the section to "Comparison with SMAP and WOA18"*

Below some minor comments/corrections the authors should take into account in their revised version:

L44-46: Please explain in which sense are the results a benchmark?

**Response:** *The word benchmark may not be appropriate. We have rewritten the implication of the research in the abstract. Please see Line 41 to Line 45 in the revised manuscript.*

L243: Should it read -h instead of -H?

**Response:** *We removed the transport calculation as suggested comments below. So, this formula no longer exists.*

L306: Do you mean the negative bias is reduced?

**Response:** *This should be the positive bias since the SSS in LLC#C is higher than the SMAP, thus the difference is positive.*

L315-317: One sees only a slight tendency and mainly in the case of the Amazon river. I would be very careful in assuming that the interannual variability is reproduced, since it depends on many factors other than the prescribed runoff... Figure 3: Why is LLC270C so much better than the other resolutions in the Amazon case? Figure 5: What is the reason for the pronounced normalized bias increase from LLC270R to LLC540R? Caption Figures S4 and S5: I believe you mean Columbia.

**Response:** *We agreed with the statement "interannual variability is reproduced" is not accurate, therefore, we have reworded this sentence to "when using DPR forcing, the SSS differences*

associated with the interannual variations of river discharge can be better represented". Please refer to Line 351 to Line 352 in the revised manuscript. Figure 3 shows in the Amazon region, the LLC270C, the coarse resolution run is closer to SMAP than CS510C, the fine resolution run. The CS510C run (the ECCO2 products) used the Stammer et al. (2004) runoff, whereas LLC270C (the ECCOv4 products) used Fekete et al. (2002) runoff. A comparison between the Stammer et al. (2004) runoff and Fekete et al. (2002) runoff for the Amazon Region is now placed in Supplementary materials (Figure S7). We can see that the Stammer runoff was more diffusive spatially and without seasonal variability, which could be the reason for the CS510C run being worse than the LLC270C run. We added the following statement "The intermediate resolution LLC270C run is better than the high resolution CS510C run for the Amazon region. This is because the Stammer et al. (2004) runoff used in CS510C is smoother spatially and lacks seasonal variability compared to the Fekete et al. (2002) runoff in LLC270C for this region (Figure S7)" from line 348 to line 352.

For pronounced bias in Figure 5, the normalized bias was calculated as:

$$B = \frac{\bar{M} - \bar{Ref}}{\sigma_{Ref}}$$

The observational reference is SMAP. Therefore, the standard deviation (denominator) does not change when comparing different runs. The pronounced bias is because the SSS difference in LLC540R and SMAP was larger than the difference between LLC270R and SMAP. For the Amazon region, SSS from LLC270R was less than 1 PSU lower than the SMAP, while LLC540R was roughly 3 PSU lower. This also happened to the Columbia, where the absolute value of bias decreased by about 0.3 PSU after switching to the LLC540R. We added the statement "which is consistent with the SSS reductions shown in Table 2 and relatively low  $W_{skill}$  shown in Table 3" from Line 379-Line 380. "In addition, SMAP may underestimate SSS near the river mouth (Fournier et al. 2017). Therefore, larger biases in high resolution run does not indicate the simulation deviates from the truth" from Line 304 to Line 306.

The captions in Figures S4 and S5 have been fixed.

L443: "and responds".

**Response:** Done. Please refer to Line 483

L430: Caption of Figure 8 is wrong. I actually do not see the point of showing both area and volume. They do not differ much in the variability they present. I suggest presenting only volume.

**Response:** We have fixed the caption of Figure 8. It may be a little repetitive to show both area and volume at the given threshold. Therefore, we switched the plume area calculation at different thresholds in Supplementary with the Figure in the Text. The original Figure S6 is Figure 8 in the revised text, and the original Figure 8 is Figure S6 in the revised supplementary. We also changed the corresponding text, please refer Line 447 to Line 454 in the revised manuscript.

L372: North Brazil Current and not Brazil Current.

**Response:** Done. Please refer to Line 409.

L458: CO instead of CR. Figure 10: Caption is incomplete.

**Response:** *CO was switched to CR, and the Caption of Figure 10 has been fixed. Please refer to Line 498, Line 499 and Line 501.*

L462: It is not clear how the transports were calculated. What do the authors mean by arc? I suggest completely removing the transport calculations from the discussion.

**Response:** *We removed the transport calculation in the method part, and corresponding text in the abstract, result, and discussion.*

L540-543: I do not understand what is meant here. Increasing resolution always increases the richness of spatio-temporal scales!

**Response:** *We thank the reviewer for pointing this out, which pushes us to rethink the implications of this part of the results. ECCO is not just a numerical model, but also a suite of global ocean data and assimilation products that can be downloaded by researchers worldwide every day. Therefore, we change the implication to “Recently increases in computational power allowed GODAS products such as ECCO, to provide model output at different resolutions, which supports regional studies using data analysis approaches or offline modeling methods (e.g., the Lagrangian method, Meng et al. 2020; Liang et al. 2019). Our results suggest that how high-resolution products should be used depends on the interested spatio-temporal dynamics as well as geomorphology characteristics of the studied region itself”. Hopefully, this statement can help ECCO-data users make better decisions in their research. Please see Line 565 to Line 569 in the revised manuscript and abstract.*
